# Supplementary material for: Molecular evidence for sulfurization of molybdenum dithiocarbamates (MoDTC) by zinc dithiophosphates: a key process in their synergetic interactions and the enhanced preservation of MoDTC in formulated lubricants?
Source: Royal Society of Chemistry journal article supplement (doi:10.1039/d1ra08657j), 2022-01-01

## Electronic Supplementary Information

### Molecular evidence for sulfurization of molybdenum dithiocarbamates (MoDTC) by zinc dithiophosphates: a key process in their synergetic interactions and the enhanced preservation of MoDTC in formulated lubricants?

Y.M. Kiw,<sup>a,b</sup> P. Adam,<sup>a</sup> P. Schaeffer,<sup>a\*</sup> B. Thiébaud,<sup>b</sup> C. Boyer,<sup>b</sup>

<sup>a</sup> University of Strasbourg, CNRS, Institut de Chimie de Strasbourg UMR 7177, F-67000 Strasbourg, France

<sup>b</sup> TotalEnergies Solaize Research Center, BP22-69360 Cedex, France

#### Supplementary Material

**Figure 1S:** (a) Summed ion chromatogram  $m/z$  725-732 obtained by HPLC-MS analysis of synthetic **2S-1d** (APPI, positive mode); (b) Mass spectrum of synthetic **2S-1d**

**Figure 2S:** (a) Summed ion chromatograms  $m/z$  947-960; 1087-1101; 1227-1241 showing the distribution of synthetic mixture of MoDTC **2S-1a**; **2S-1b**; **2S-1c** obtained by HPLC-MS analysis (b) Summed mass spectra of the synthesized mixture of 2S-MoDTC **1a-1c** recorded between 7.1 and 9.1 min (HPLC-MS, APPI detection, positive mode).

**Figure 3S:** Oil samples collected over a period of 17-18 h during the oil ageing experiments involving 1 wt. % of 2S-MoDTC substrates **2S-1a-1c** in hydrocarbon base oils at 135 °C under (a) argon and (b) air bubbling.

**Figure 4S:** (a) Summed ion chromatograms  $m/z$  931-944; 1071-1085; 1211-1225 showing the distribution of MoDTC **1S-1a**; **1S-1b**; **1S-1c** obtained by HPLC-MS analysis (b) Summed mass spectra of MoDTC complexes **1S-1a-1c** recorded between 7.1 and 9.1 min (HPLC-MS, APPI detection, positive mode) as oxidative degradation products of MoDTC complexes **2S-1a-1c** after 4 h under air condition at 135 °C.

**Figure 5S:** (a) Summed ion chromatograms (HPLC-MS, APPI, positive mode)  $m/z$  896-916; 1036-1057; 1177-1198 showing the distribution of MoDTC **1O-1a**; **1O-1b**; **1O-1c** (b) Summed mass spectra between 7.5 and 12.5 min (HPLC-MS, APPI, positive mode) of MoDTC **1O-1a-1c** as oxidative degradation products of MoDTC **1a-1c** after 9 h under air bubbling at 135 °C.

**Figure 6S:** Evolution of the concentrations of MoDTC complexes **1O-1a-1c** as oxidative degradation products formed during the heating experiment involving 1 wt. % of MoDTC **1a-1c** under bubbling with (a) air and (b) NO<sub>2</sub> (2000 ppm) in air at 135 °C. IS: Internal standard. \*Y-axis: arbitrary units. Error bars correspond to triplicate HPLC-MS analyses for each sample.

**Figure 7S:** Gas chromatogram (RIC; GC-MS, EI, 70 eV) of the ligands (analyzed as methylated derivatives) released after MeI treatment of di-isooctyl ZnDTP **2c**

**Figure 1S:** (a) Summed ion chromatogram  $m/z$  725-732 obtained by HPLC-MS analysis of synthetic **2S-1d** (APPI, positive mode); (b) Mass spectrum of synthetic **2S-1d**

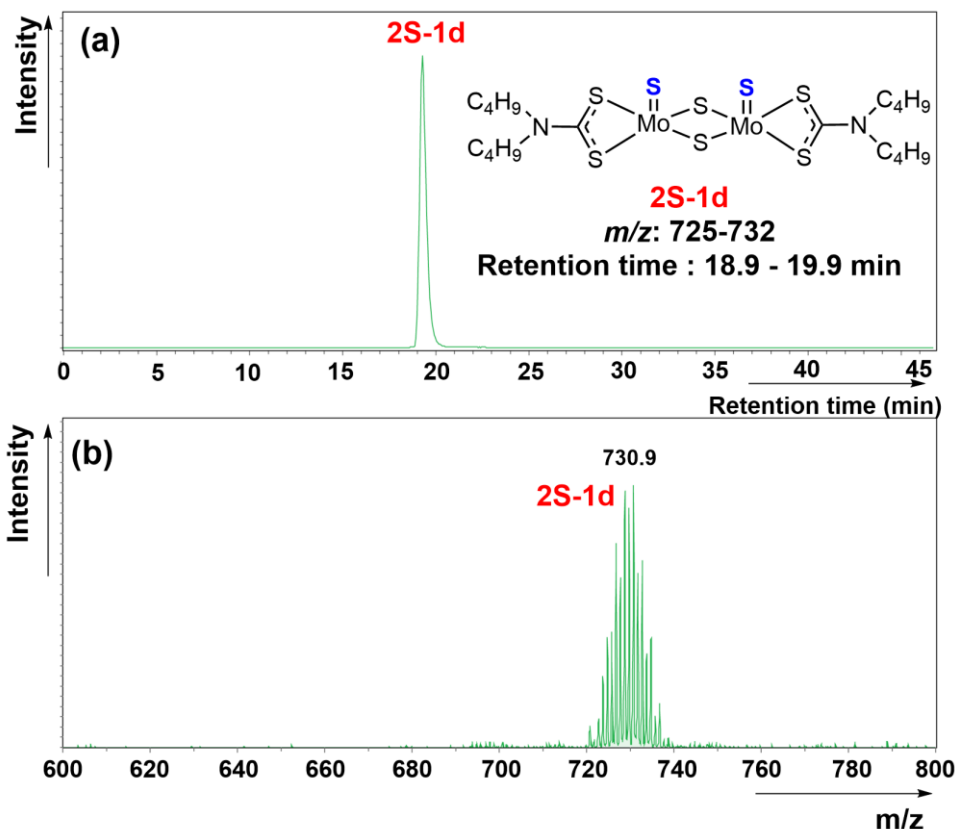

**Figure 2S:** (a) Summed ion chromatograms  $m/z$  947-960; 1087-1101; 1227-1241 showing the distribution of synthetic mixture of MoDTC **2S-1a**; **2S-1b**; **2S-1c** obtained by HPLC-MS analysis (b) Summed mass spectra of the synthesized mixture of 2S-MoDTC **1a-1c** recorded between 7.1 and 9.1 min (HPLC-MS, APPI detection, positive mode).

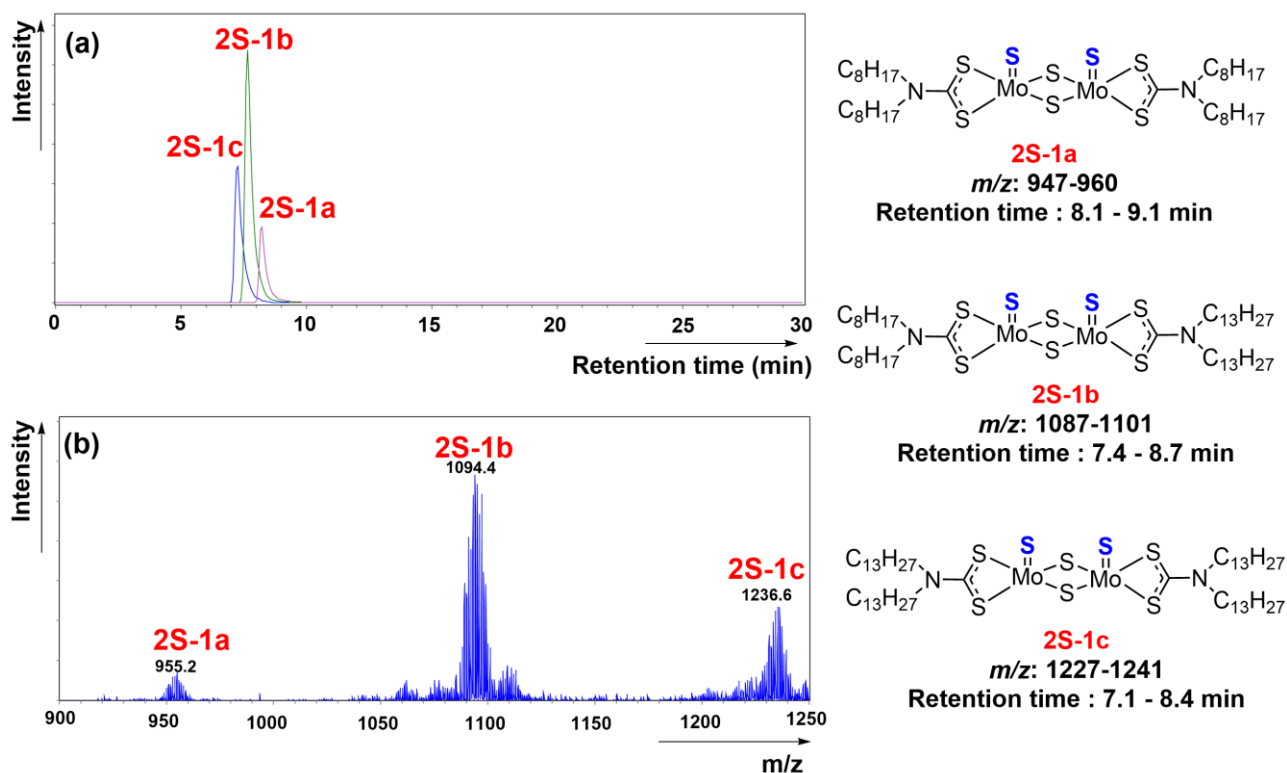

**Figure 3S:** Oil samples collected over a period of 17-18 h during the oil ageing experiments involving 1 wt. % of 2S-MoDTC substrates **2S-1a-1c** in hydrocarbon base oils at 135 °C under **(a)** argon and **(b)** air bubbling.

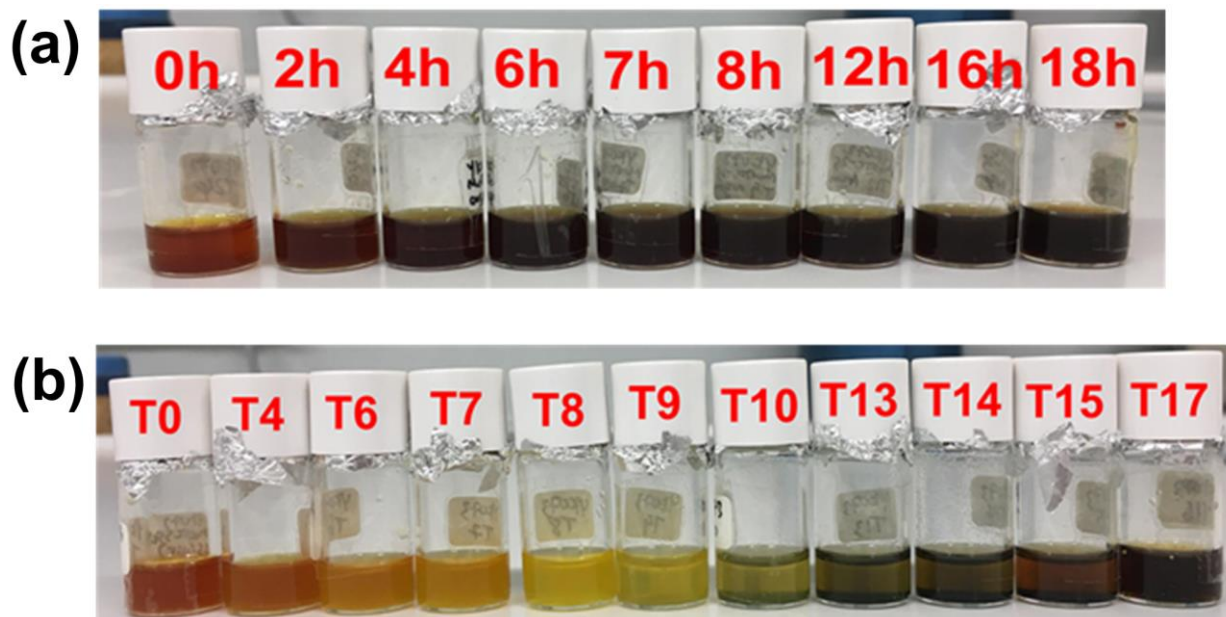

**Figure 4S:** **(a)** Summed ion chromatograms  $m/z$  931-944; 1071-1085; 1211-1225 showing the distribution of MoDTC **1S-1a**; **1S-1b**; **1S-1c** obtained by HPLC-MS analysis **(b)** Summed mass spectra of MoDTC complexes **1S-1a-1c** recorded between 7.1 and 9.1 min (HPLC-MS, APPI detection, positive mode) as oxidative degradation products of MoDTC complexes **2S-1a-1c** after 4 h under air condition at 135 °C.

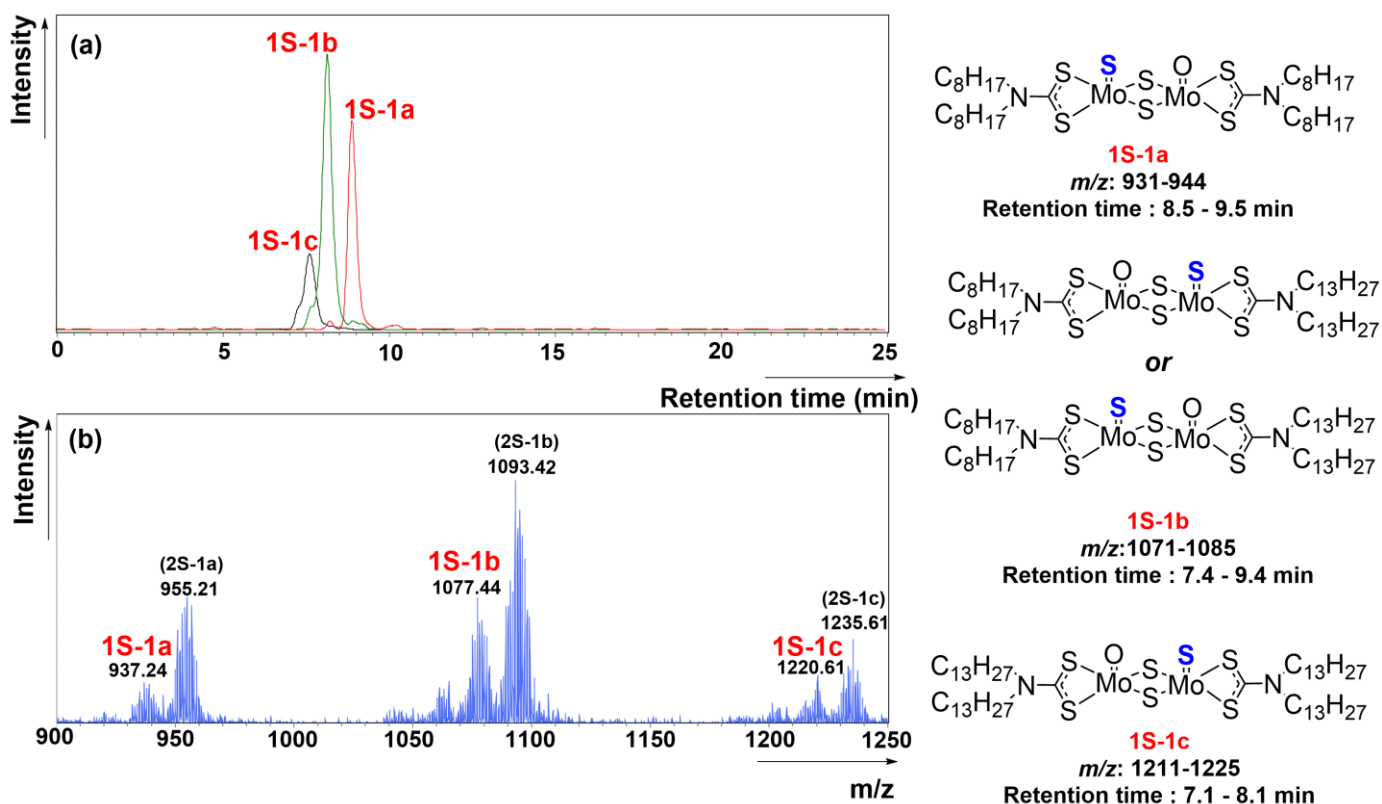

**Figure 5S:** (a) Summed ion chromatograms (HPLC-MS, APPI, positive mode)  $m/z$  896-916; 1036-1057; 1177-1198 showing the distribution of MoDTC **10-1a**; **10-1b**; **10-1c** (b) Summed mass spectra between 7.5 and 12.5 min (HPLC-MS, APPI, positive mode) of MoDTC **10-1a-1c** as oxidative degradation products of MoDTC **1a-1c** after 9 h under air bubbling at 135 °C.

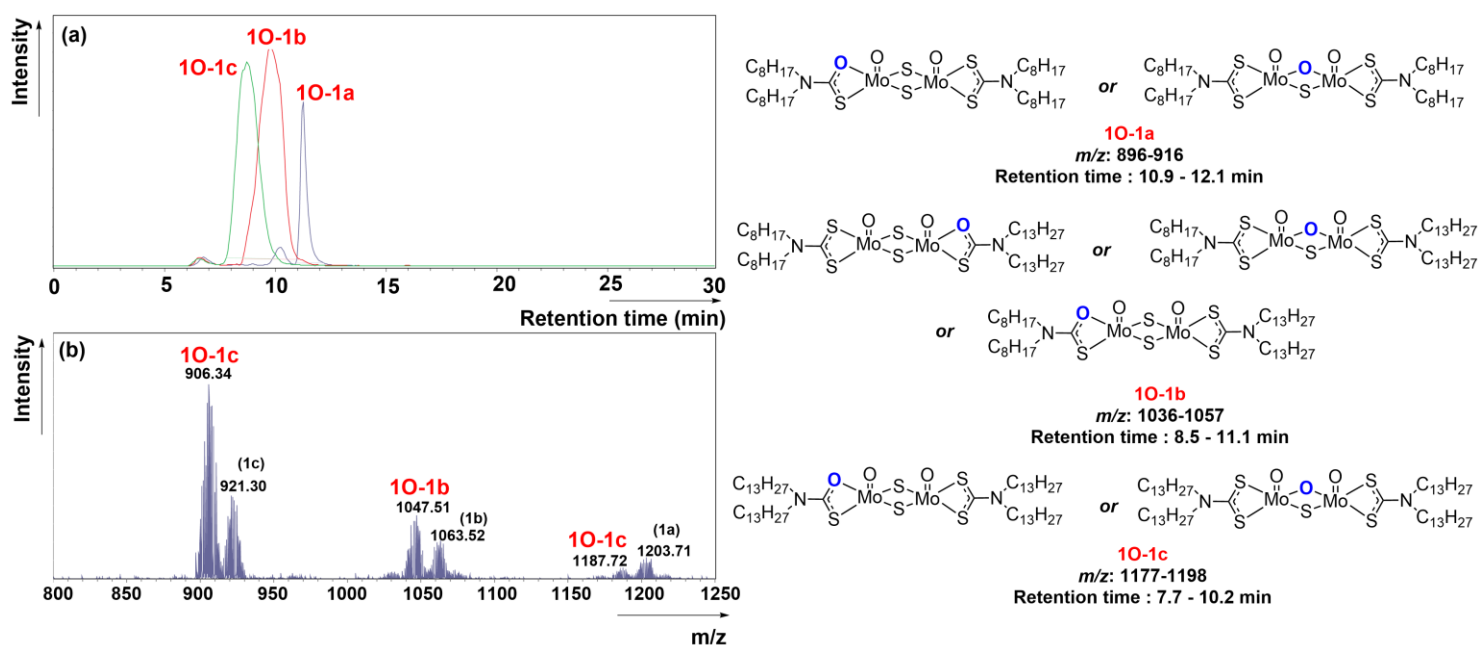

**Figure 6S:** Evolution of the concentrations of MoDTC complexes **10-1a-1c** as oxidative degradation products formed during the heating experiment involving 1 wt. % of MoDTC **1a-1c** under bubbling with (a) air and (b) NO<sub>2</sub> (2000 ppm) in air at 135 °C. IS: Internal standard. \*Y-axis: arbitrary units. Error bars correspond to triplicate HPLC-MS analyses for each sample.

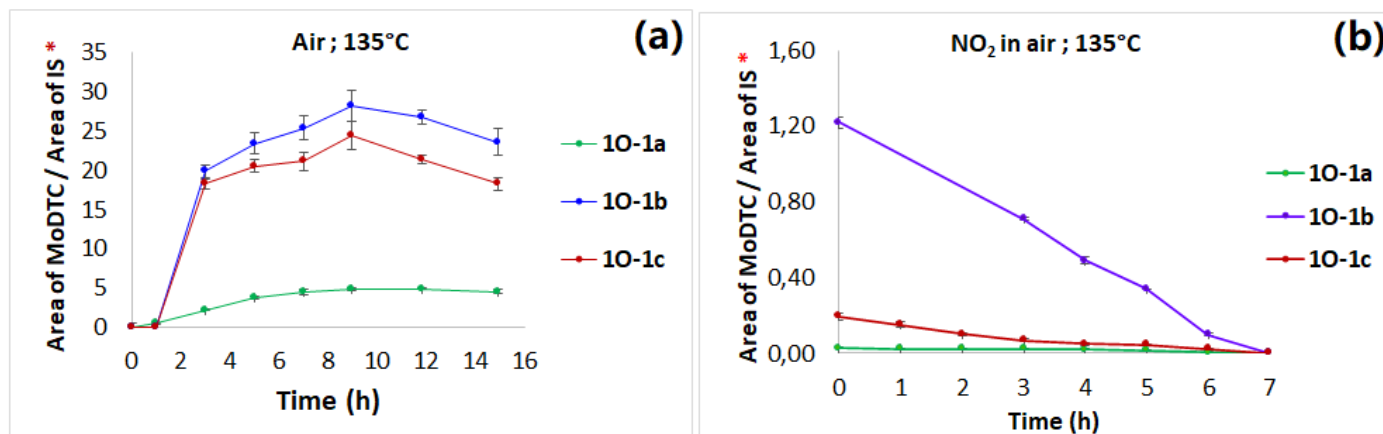

Supplement: d1ra08657j1.pdf [file d1ra08657j1.pdf]
